# Supplementary material
Source: Springer Nature journal article supplement (https://www.springermedizin.de/resource/supplementary/13058_2011_2873_MOESM5_ESM.pdf/9702762)

**A. Single dose  
(50 mg/kg)**

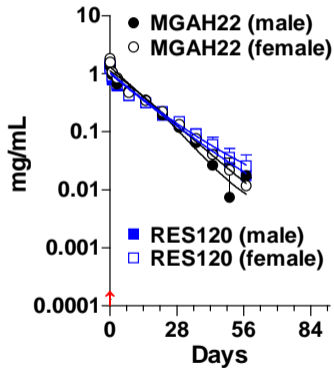

**B. Repeat dose  
(15 mg/kg)**

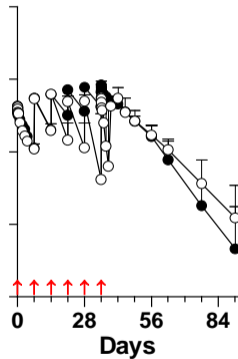

**C. Repeat dose  
(50 mg/kg)**

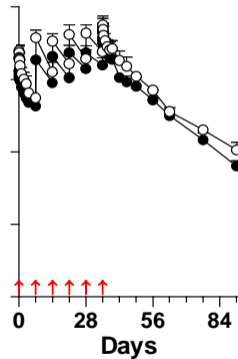

**D. Repeat dose  
(150 mg/kg)**

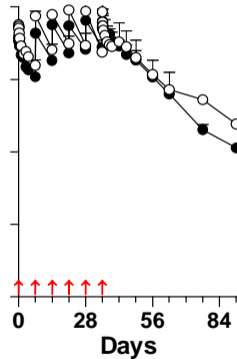

Supplement: MOESM5 [file 9702762]
